# Supplementary material
Source: PubMed Central journal article supplement (PMC6597223)
Supplement: jci-129-127080-s112.pdf [file jci-129-127080-s112.pdf]

## Supplemental Data

### **SIRT1 regulates metabolism and leukemogenic potential in CML stem cells**

Ajay Abraham, Shaowei Qiu, Balu K. Chacko, Hui Li, Andrew Paterson, Jianbo He, Puneet Agarwal, Mansi Shah, Robert Welner, Victor M Darley-Usmar, Ravi Bhatia

## Supplemental Figure Legends

### Supplementary Figure 1.

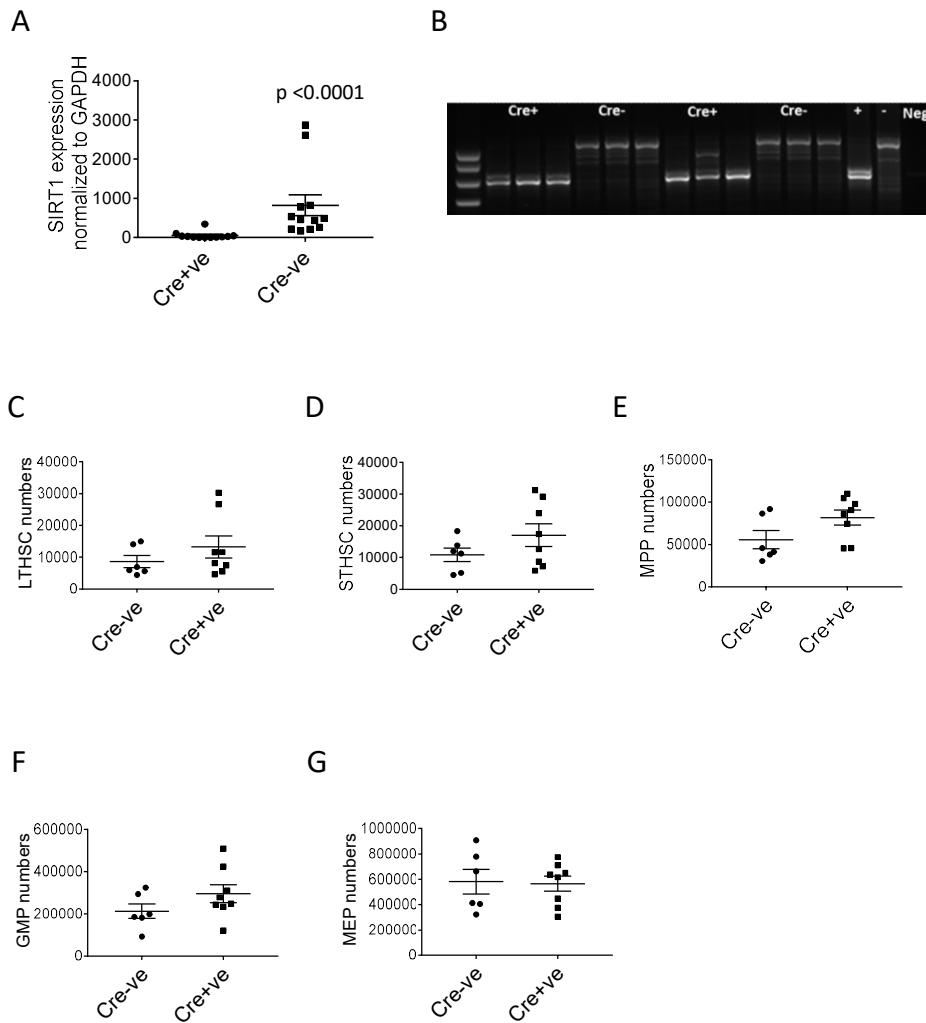

### Supplementary Figure 1 (related to Figure 1)

(A) Q-RT-PCR for SIRT1 expression in whole BM cells from Cre+ve and Cre-ve mice. (B) Genomic DNA PCR for SIRT1 excision, checked 2 weeks post plpC induction. Results of transplantation of

BM cells into secondary recipients (n=8). Absolute numbers of BM LTHSC (C), STHSC (D), MPP (E), GMP (F) and MEP (G) 20 weeks post-secondary transplant.

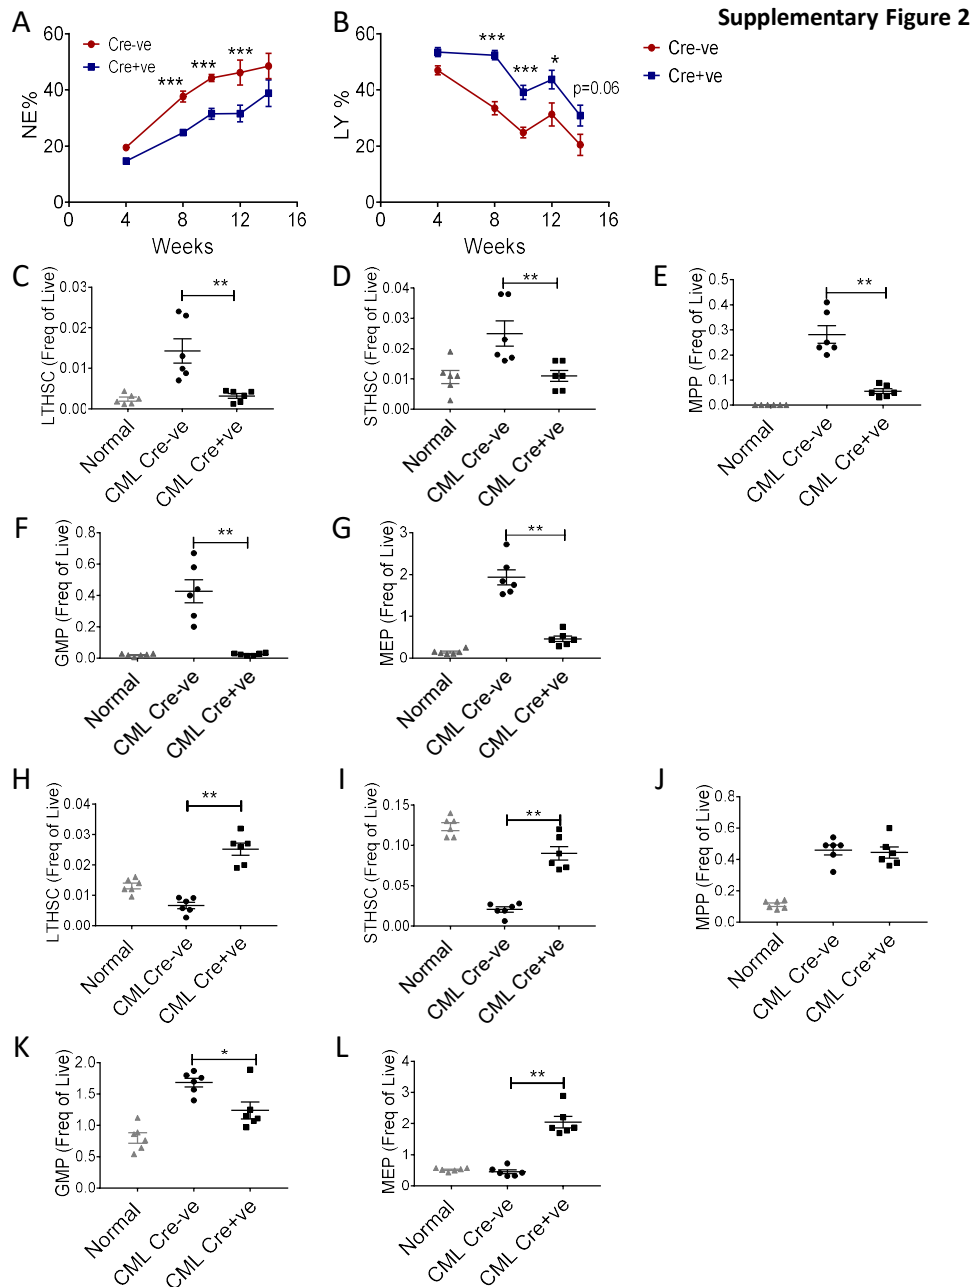

**Supplementary Figure 2 (related to Figure 3)**

(A) Neutrophil percentage and (B) Percentage of CD19+B220+ B cells in Cre-ve and Cre+ve CML mice. (C-G) Frequencies of splenic stem and progenitor sub-populations (LTHSC, STHSC, MPP,

GMP and MEP) 8 weeks after CML induction and SIRT1 deletion. (H-L) Frequencies of BM stem and progenitor sub-populations (LTHSC, STHSC, MPP, GMP and MEP) 8 weeks after CML induction and SIRT1 deletion. Corresponding stem and progenitor cell populations from normal mice are shown for comparison. Error bars represent mean  $\pm$  SEM. \*P <0.05, \*\*P <0.01, \*\*\*P <0.001, using t-test.

**Supplementary Figure 3**

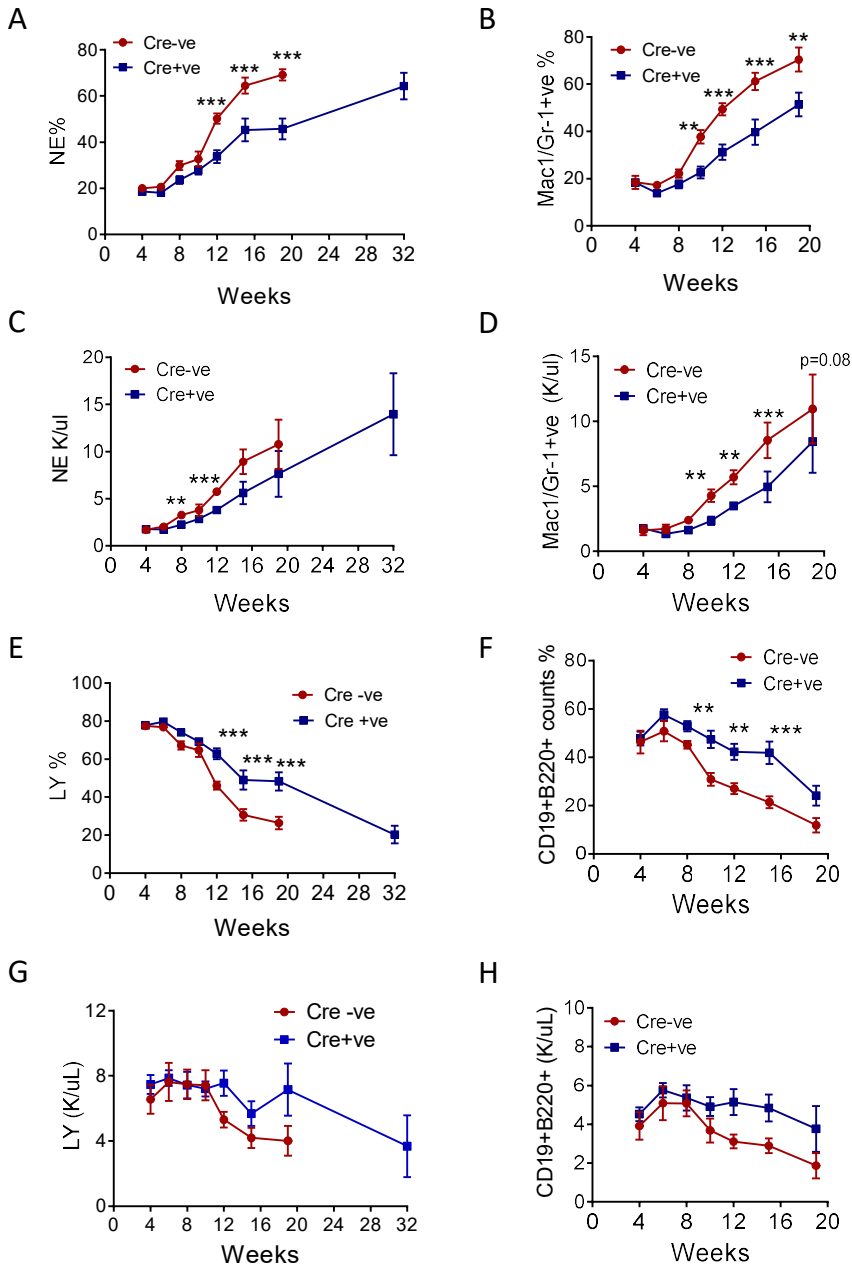

**Supplementary Figure 3 (related to Figure 3)**

Peripheral blood counts from primary Cre+ and Cre- mice followed for survival as shown in Figure 3T. (A) Neutrophil percentage, (B) absolute number of neutrophils, (C) Gr1+/Mac-1+ myeloid cell percentage, (D) absolute number of Gr1+/Mac-1+ myeloid cells, (E) lymphocyte percentage, (F)

absolute number of lymphocytes, (G) CD19+/B220+ B cell percentage, (H) absolute number of CD19+/B220+ B cells, are shown. Error bars represent mean  $\pm$  SEM. \*P <0.05, \*\*P <0.01, \*\*\*P <0.001, using t-tests.

**Supplementary Figure 4**

**A**

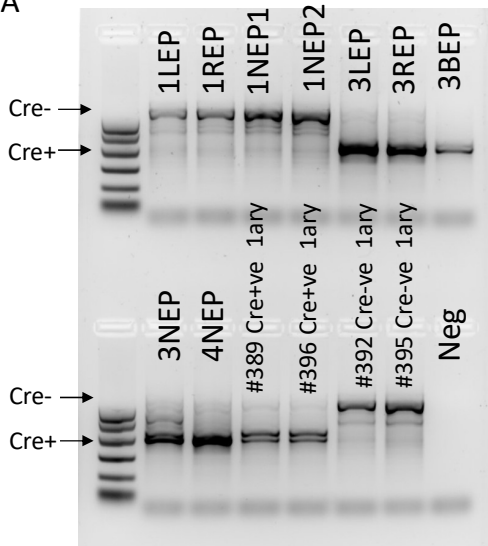

**Blood Counts at 22 weeks CML (09/22/2016)**

|        |       | WBC   | NE    | NE %  | PLT  |
|--------|-------|-------|-------|-------|------|
| 1 LEP  | Cre - | 19.18 | 10.54 | 54.94 | 3768 |
| 1 REP  | Cre - | 8.38  | 4.75  | 56.71 | 3012 |
| 1 NEP1 | Cre - | 8.7   | 6.12  | 70.3  | 1113 |
| 1 NEP2 | Cre - | 18.54 | 6.79  | 36.6  | 1210 |
| 3 LEP  | Cre+  | 11.14 | 4.47  | 40.1  | 237  |
| 3 REP  | Cre+  | 10.76 | 6.33  | 58.85 | 3389 |
| 3 BEP  | Cre+  | 3.1   | 1.41  | 45.49 | 168  |
| 3 NEP  | Cre+  | 7.4   | 5.09  | 68.78 | 1049 |
| 4 NEP  | Cre+  | 12.36 | 5.02  | 40.59 | 2368 |

**B**

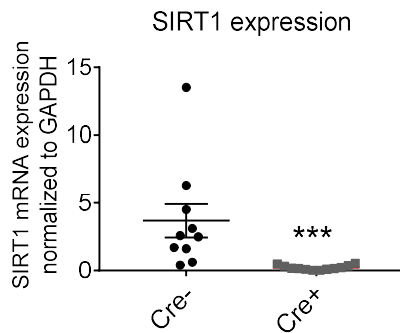

**Supplementary Figure 4 (related to Figure 3)**

(A) Genomic DNA PCR for SIRT1 excision, checked after 22 weeks post plpC induction and CML induction to check SIRT1 deletion. (B) Q-RT-PCR for Sirt1 expression after 20 weeks post CML and plpC induction. Error bars represent mean  $\pm$  SEM. \*\*\*P < 0.001, using t-test.



Supplementary Figure 5

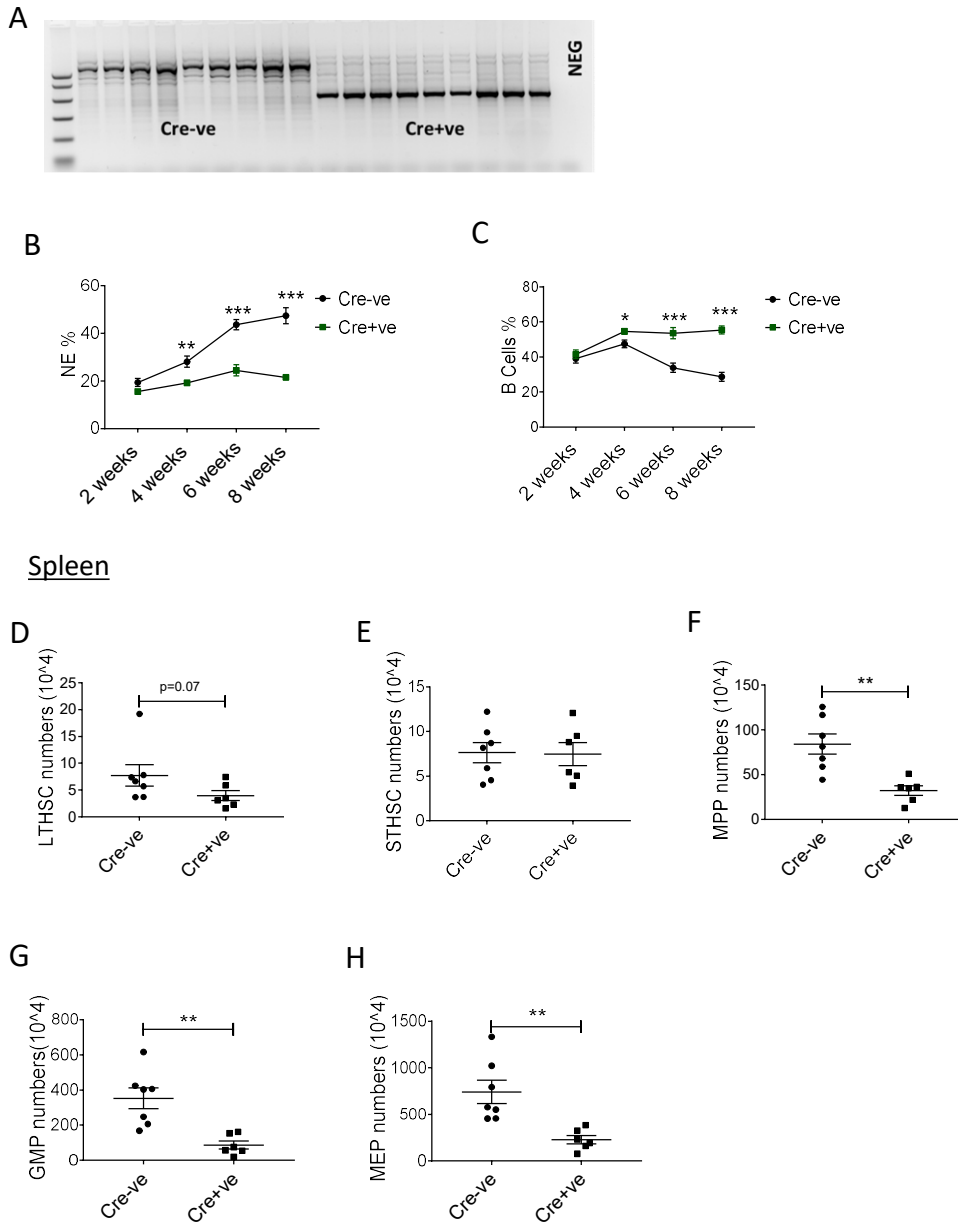

Supplementary Figure 5 (related to Figure 4)

(A) Genomic DNA PCR for SIRT1 excision in the UBC ERT2-Cre/SIRT1<sup>fl/fl</sup>/BCR-ABL model checked 2 weeks after Tamoxifen (TAM) administration. (B-C) Neutrophil (NE) percentages and donor derived B cells from peripheral blood of BA UBC ERT2-Cre SIRT1<sup>fl/fl</sup> or Cre-ve controls. (D-H)

Splenic stem and progenitor frequencies (LTHSC, STHSC, MPP, GMP and MEP) at 8 weeks post SIRT1 deletion and CML induction. Error bars represent mean  $\pm$  SEM. \*P <0.05, \*\*P <0.01, \*\*\*P <0.001, using t-tests.

**Supplementary Figure 6**

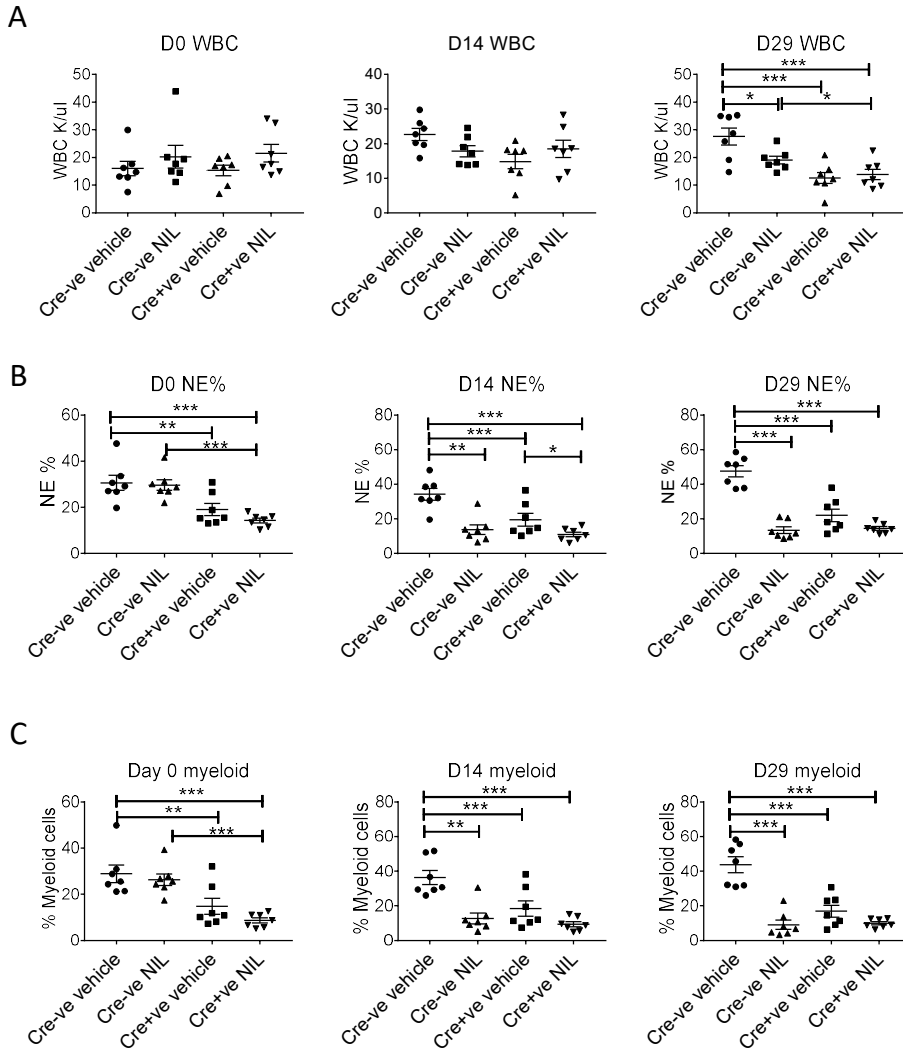

**Supplementary Figure 6 (related to Figure 5)**

(A) Total WBC count, (B) Neutrophil (NE) % and (C) Gr1+/Mac1+ myeloid cells frequencies during Nilotinib (NIL) treatment. Error bars represent mean ± SEM. \*P <0.05, \*\*P <0.01, \*\*\*P <0.001, using ordinary one-way analysis of variance, correcting for multiple comparisons by controlling

the False Discovery Rate using the two-stage linear step-up procedure of Benjamini, Krieger and Yekutieli.

**A** Supplementary Figure 7

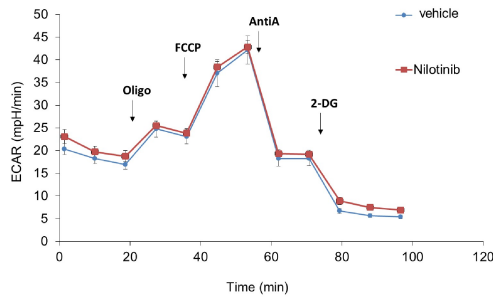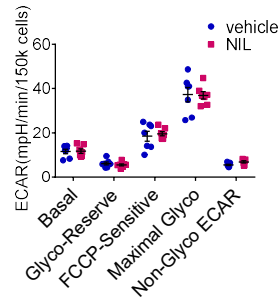

**B** CD34+CD38+

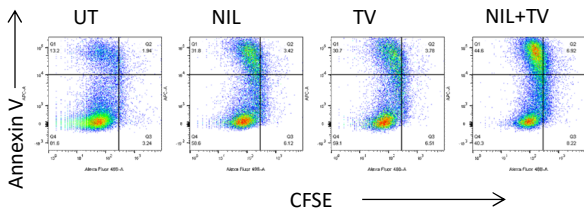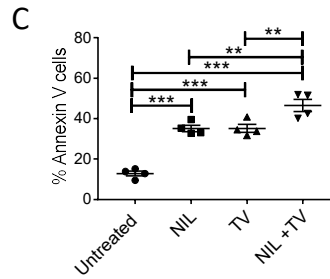

**D** CD34+CD38+

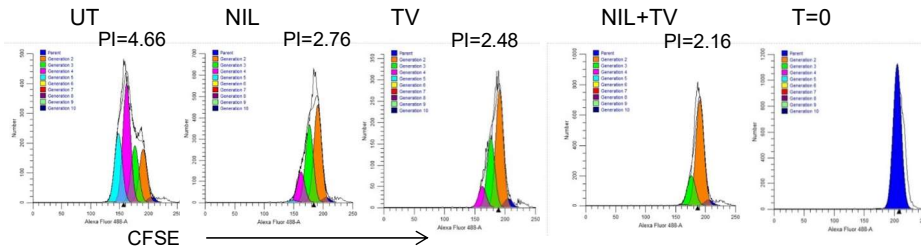

**E**

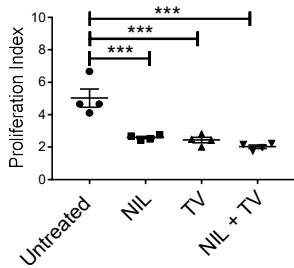

**Supplementary Figure 7 (related to Figure 8)**

(A) ECAR measurements from c-Kit cells from CML mice treated with Nilotinib or vehicle (n=7 each) for 2 weeks (B) Representative flow cytometry plots showing Annexin V and CFSE

expression for CML CP committed progenitors (CD34+CD38+) populations. (C) Apoptosis measured by Annexin V expression on CD34+CD38 cells. (D) Representative proliferation index plots generated using ModFit LT V5.09 after treating CML CD34+CD38+ cells with NIL or TV39OH or the combination. (E) Proliferation index measured based on analysis of CFSE plots on CML CD34+CD38+ cells. Error bars represent mean  $\pm$  SEM. \*P <0.05, \*\*P <0.01, \*\*\*P <0.001, using ordinary one-way analysis of variance (C, E), and two-way analysis of variance (A), correcting for multiple comparisons by controlling the False Discovery Rate using the two-stage linear step-up procedure of Benjamini, Krieger and Yekutieli.

Supplementary Figure 8

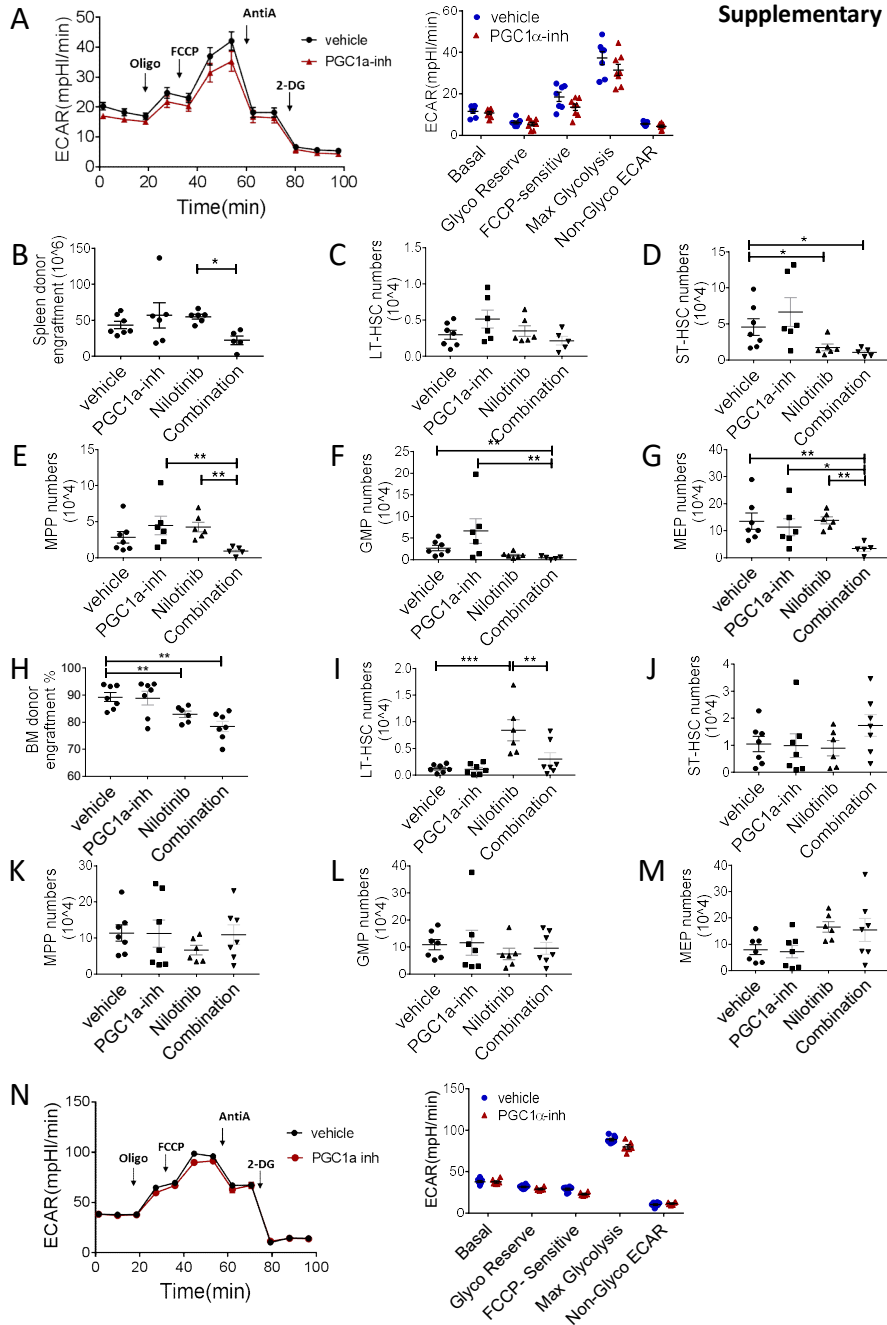

Supplementary Figure 8 (related to Figure 9)

(A) ECAR measurements in c-Kit<sup>+</sup> cells from CML mice treated with PGC1α inhibitor (SR18292) or vehicle (n=7 each) for 2 weeks. (B-F) Effect of vehicle, Nilotinib, SR18292 or the combination of Nilotinib and SR18292 on spleen donor cell engraftment percentage (B) and absolute number of

LT-HSC (C), ST-HSC (D), MPP (E), GMP (F) and MEP (G). (H-M) Effect of vehicle, Nilotinib, SR18292 and combination treatment on bone marrow donor cell engraftment percentage (H) and absolute number of LT-HSC (I), ST-HSC (J), MPP (K), GMP (L) and MEP (M). (N) ECAR measurement in CP CML CD34+ cells (n=3) treated overnight with SR18292 (40 $\mu$ M) or vehicle. Error bars represent mean  $\pm$  SEM. \*P <0.05, \*\*P <0.01, \*\*\*P <0.001, using ordinary one-way analysis of variance (B-M), and two-way analysis of variance (A, N), correcting for multiple comparisons by controlling the False Discovery Rate using the two-stage linear step-up procedure of Benjamini, Krieger and Yekutieli.



**Supplementary Table 1:** Major down regulated gene signatures are shown with normalized enrichment scores (NES) and FDR q values.

| NAME                                                                                                                       | NES      | FDR q-val |
|----------------------------------------------------------------------------------------------------------------------------|----------|-----------|
| REACTOME_TRANSLATION                                                                                                       | -8.51535 | 0         |
| REACTOME_3_UTR_MEDIATED_TRANSLATIONAL_REGULATION                                                                           | -8.5147  | 0         |
| KEGG_RIBOSOME                                                                                                              | -8.37927 | 0         |
| REACTOME_PEPTIDE_CHAIN_ELONGATION                                                                                          | -8.18423 | 0         |
| REACTOME_METABOLISM_OF_PROTEINS                                                                                            | -6.69311 | 0         |
| KEGG_PROTEASOME                                                                                                            | -4.33109 | 0         |
| WONG_MITOCHONDRIA_GENE_MODULE                                                                                              | -7.29781 | 0         |
| HALLMARK_OXIDATIVE_PHOSPHORYLATION                                                                                         | -6.99456 | 0         |
| KEGG_OXIDATIVE_PHOSPHORYLATION                                                                                             | -6.46951 | 0         |
| MOOTHA_VOXPPOS                                                                                                             | -6.34962 | 0         |
| REACTOME_RESPIRATORY_ELECTRON_TRANSPORT_ATP_SYNTHESIS_BY_CHEMIOSMOTIC_COUPLING_AND_HEAT_PRODUCTION_BY_UNCOUPLING_PROTEINS_ | -6.33174 | 0         |
| MOOTHA_HUMAN_MITODB_6_2002                                                                                                 | -6.30274 | 0         |
| MOOTHA_MITOCHONDRIA                                                                                                        | -6.03047 | 0         |
| REACTOME_TCA_CYCLE_AND_RESPIRATORY_ELECTRON_TRANSPORT                                                                      | -5.94922 | 0         |
| REACTOME_RESPIRATORY_ELECTRON_TRANSPORT                                                                                    | -5.68872 | 0         |
| HALLMARK_MYC_TARGETS_V1                                                                                                    | -6.92465 | 0         |
| DANG_MYC_TARGETS_UP                                                                                                        | -5.59138 | 0         |
| WONG_EMBRYONIC_STEM_CELL_CORE                                                                                              | -6.07669 | 0         |
| WANG_TUMOR_INVASIVENESS_UP                                                                                                 | -5.46366 | 0         |
| SWEET_LUNG_CANCER_KRAS_UP                                                                                                  | -4.6214  | 0         |

**Supplementary Table 2:** Major upregulated gene signatures in SIRT1 deleted LSK cells.

Normalized enrichment scores (NES) and FDR q values are shown.

| NAME                                                    | NES      | FDR q-val |
|---------------------------------------------------------|----------|-----------|
| DAZARD_RESPONSE_TO_UV_NHEK_DN                           | 4.196072 | 0         |
| DACOSTA_UV_RESPONSE_VIA_ERCC3_COMMON_DN                 | 3.698989 | 0         |
| IVANOVA_HEMATOPOIESIS_STEM_CELL                         | 3.347069 | 5.26E-05  |
| JAATINEN_HEMATOPOIETIC_STEM_CELL_UP                     | 3.28904  | 4.99E-05  |
| SENESE_HDAC3_TARGETS_UP                                 | 3.014233 | 3.89E-04  |
| MARTINEZ_TP53_TARGETS_UP                                | 2.797554 | 0.0004    |
| WU_APOPTOSIS_BY_CDKN1A_VIA_TP53                         | 2.778269 | 0.00101   |
| MARTINEZ_RB1_AND_TP53_TARGETS_UP                        | 2.672336 | 0.001934  |
| UNSTIM_VS_WNT_PATHWAY_STIM_HEMATOPOIETIC_PROGENITORS_UP | 2.426548 | 0.007462  |
| KEGG_NOTCH_SIGNALING_PATHWAY                            | 2.059031 | 0.037426  |

**Supplementary Table 3:** Top 100 GSEA signatures from CML vs normal LTHSC RNA analysis were compared with the corresponding GSEA signatures in SIRT1KO vs controls. Normalized enrichment scores (NES) were compared.

SL No NAME

- 1 STARK\_PREFRONTAL\_CORTEX\_22Q11\_DELETION\_DN
- 2 **WONG\_MITOCHONDRIA\_GENE\_MODULE**
- 3 HSIAO\_HOUSEKEEPING\_GENES
- 4 **REACTOME\_RESPIRATORY\_ELECTRON\_TRANSPORT\_ATP\_SYNTHESIS**
- 5 REACTOME\_METABOLISM\_OF\_MRNA
- 6 **HALLMARK\_OXIDATIVE\_PHOSPHORYLATION**
- 7 REACTOME\_TRANSLATION
- 8 REACTOME\_METABOLISM\_OF\_RNA
- 9 REACTOME\_INFLUENZA\_VIRAL\_RNA\_TRANSCRIPTION\_AND\_REPLICATION
- 10 GSE2405\_OH\_VS\_24H\_A\_PHAGOCYTOPHILUM\_STIM\_NEUTROPHIL\_UP
- 11 YAO\_TEMPORAL\_RESPONSE\_TO\_PROGESTERONE\_CLUSTER\_13
- 12 **KEGG\_OXIDATIVE\_PHOSPHORYLATION**
- 13 REACTOME\_PEPTIDE\_CHAIN\_ELONGATION
- 14 **REACTOME\_RESPIRATORY\_ELECTRON\_TRANSPORT**
- 15 REACTOME\_SRP\_DEPENDENT\_COTRANSLATIONAL\_PROTEIN\_TARGETING\_TO\_MEMBRANE
- 16 KEGG\_RIBOSOME
- 17 **MOOTHA\_HUMAN\_MITODB\_6\_2002**
- 18 **MOOTHA\_VOXPPOS**
- 19 **REACTOME\_TCA\_CYCLE\_AND\_RESPIRATORY\_ELECTRON\_TRANSPORT**
- 20 REACTOME\_3\_UTR\_MEDIATED\_TRANSLATIONAL\_REGULATION
- 21 KEGG\_PARKINSONS\_DISEASE
- 22 REACTOME\_NONSENSE\_MEDIATED\_DECAY\_ENHANCED\_BY\_THE\_EXON\_JUNCTION\_COMPLEX
- 23 GSE2405\_OH\_VS\_9H\_A\_PHAGOCYTOPHILUM\_STIM\_NEUTROPHIL\_DN
- 24 REACTOME\_METABOLISM\_OF\_PROTEINS
- 25 GSE26030\_TH1\_VS\_TH17\_RESTIMULATED\_DAYS\_POST\_POLARIZATION\_UP
- 26 YAO\_TEMPORAL\_RESPONSE\_TO\_PROGESTERONE\_CLUSTER\_17
- 27 **MOOTHA\_MITOCHONDRIA**
- 28 GSE3720\_UNSTIM\_VS\_PMA\_STIM\_VD1\_GAMMADelta\_TCELL\_UP
- 29 WONG\_EMBRYONIC\_STEM\_CELL\_CORE
- 30 REACTOME\_INFLUENZA\_LIFE\_CYCLE
- 31 KEGG\_HUNTINGTONS\_DISEASE
- 32 TAKAO\_RESPONSE\_TO\_UVB\_RADIATION\_UP
- 33 DAIRKEE\_TERT\_TARGETS\_UP
- 34 KAECH\_DAYS\_EFF\_VS\_DAY15\_EFF\_CD8\_TCELL\_UP
- 35 GSE14000\_TRANSLATED\_RNA\_VS\_MRNA\_DC\_DN
- 36 LI\_AMPLIFIED\_IN\_LUNG\_CANCER
- 37 REACTOME\_VIF\_MEDIATED\_DEGRADATION\_OF\_APOBEC3G
- 38 REACTOME\_ER\_PHAGOSOME\_PATHWAY
- 39 BILANGES\_SERUM\_AND\_RAPAMYCIN\_SENSITIVE\_GENES
- 40 GSE24210\_CTRL\_VS\_IL35\_TREATED\_TCONV\_CD4\_TCELL\_DN
- 41 REACTOME\_SCF\_BETA\_TRCP\_MEDIATED\_DEGRADATION\_OF\_EMI1
- 42 KEGG\_PROTEASOME
- 43 CHNG\_MULTIPLE\_MYELOMA\_HYPERPLOID\_UP
- 44 SWEET\_LUNG\_CANCER\_KRAS\_UP
- 45 REACTOME\_CDK\_MEDIATED\_PHOSPHORYLATION\_AND\_REMOVAL\_OF\_CDC6
- 46 REACTOME\_AUTODEGRADATION\_OF\_THE\_E3\_UBIQUITIN\_LIGASE\_COP1
- 47 REACTOME\_REGULATION\_OF\_APOPTOSIS
- 48 REACTOME\_CROSS\_PRESENTATION\_OF\_SOLUBLE\_EXOGENOUS\_ANTIGENS\_ENDOSOMES
- 49 HALLMARK\_MYC\_TARGETS\_V1
- 50 PECE\_MAMMARY\_STEM\_CELL\_UP
- 51 GSE26030\_TH1\_VS\_TH17\_RESTIMULATED\_DAY15\_POST\_POLARIZATION\_DN
- 52 KAECH\_NAIVE\_VS\_DAYS\_EFF\_CD8\_TCELL\_DN
- 53 REACTOME\_ANTIGEN\_PROCESSING\_CROSS\_PRESENTATION
- 54 GSE22886\_DAY1\_VS\_DAY7\_MONOCYTE\_IN\_CULTURE\_DN
- 55 REACTOME\_P53\_INDEPENDENT\_G1\_S\_DNA\_DAMAGE\_CHECKPOINT
- 56 REACTOME\_CDT1\_ASSOCIATION\_WITH\_THE\_CDC6\_ORC\_ORIGIN\_COMPLEX
- 57 REACTOME\_REGULATION\_OF\_ORNITHINE\_DECARBOXYLASE\_ODC
- 58 GSE45837\_WT\_VS\_GFI1\_KO\_PDC\_DN
- 59 REACTOME\_DESTABILIZATION\_OF\_MRNA\_BY\_AUF1\_HNRNP\_D0
- 60 GSE9509\_10MIN\_VS\_30MIN\_LPS\_STIM\_IL10\_KO\_MACROPHAGE\_UP
- 61 GSE2770\_UNTREATED\_VS\_ACT\_CD4\_TCELL\_6H\_UP
- 62 REACTOME\_METABOLISM\_OF\_AMINO\_ACIDS\_AND\_DERIVATIVES
- 63 GSE42724\_NAIVE\_VS\_B1\_BCELL\_DN
- 64 REACTOME\_APC\_C\_CDH1\_MEDIATED\_DEGRADATION
- 65 CHIANG\_LIVER\_CANCER\_SUBCLASS\_UNANNOTATED\_DN
- 66 REACTOME\_SCF5KP2\_MEDIATED\_DEGRADATION\_OF\_P27\_P21
- 67 GSE22886\_NEUTROPHIL\_VS\_MONOCYTE\_DN
- 68 REACTOME\_REGULATION\_OF\_MRNA\_STABILITY\_BY\_PROTEINS\_THAT\_BIND\_AU\_RICH\_ELEMENTS
- 69 GSE39820\_TGFBETA1\_IL6\_VS\_TGFBETA1\_IL6\_IL23A\_TREATED\_CD4\_TCELL\_DN
- 70 GSE13547\_2H\_VS\_12\_H\_ANTI\_IgM\_STIM\_BCELL\_DN
- 71 BIOCARTE\_PROTEASOME\_PATHWAY
- 72 REACTOME\_P53\_DEPENDENT\_G1\_DNA\_DAMAGE\_RESPONSE
- 73 ENK\_UV\_RESPONSE\_KERATINOCYTE\_UP
- 74 KAMIKUBO\_MYELOID\_CEBPA\_NETWORK
- 75 KEGG\_ALZHEIMERS\_DISEASE
- 76 REACTOME\_REGULATION\_OF\_MITOTIC\_CELL\_CYCLE
- 77 REACTOME\_APC\_C\_CD20\_MEDIATED\_DEGRADATION\_OF\_MITOTIC\_PROTEINS
- 78 GSE3720\_UNSTIM\_VS\_LPS\_STIM\_VD2\_GAMMADelta\_TCELL\_UP
- 79 GSE12845\_IGD\_NEG\_BLOOD\_VS\_NAIVE\_TONSIL\_BCELL\_UP
- 80 TARTE\_PLASMA\_CELL\_VS\_PLASMABLAST\_DN
- 81 KAECH\_DAYS\_EFF\_VS\_MEMORY\_CD8\_TCELL\_UP
- 82 GSE9650\_EFFECTOR\_VS\_MEMORY\_CD8\_TCELL\_UP
- 83 GSE7509\_UNSTIM\_VS\_FCGRIIB\_STIM\_MONOCYTE\_UP
- 84 GSE17721\_PAM3CSK4\_VS\_CPG\_12H\_BMDC\_UP
- 85 GSE14699\_DELETIONAL\_TOLERANCE\_VS\_ACTIVATED\_CD8\_TCELL\_DN
- 86 BURTON\_ADIPOGENESIS\_6
- 87 GSE13522\_CTRL\_VS\_T\_CRUIZ\_Y\_STRAIN\_INF\_SKIN\_BALBC\_MOUSE\_UP
- 88 GSE14000\_TRANSLATED\_RNA\_VS\_MRNA\_4H\_LPS\_DC\_DN
- 89 GSE26030\_UNSTIM\_VS\_RESTIM\_TH1\_DAYS\_POST\_POLARIZATION\_DN
- 90 REACTOME\_ACTIVATION\_OF\_NF\_KAPPA\_B\_IN\_B\_CELLS
- 91 **MOOTHA\_PGC**
- 92 GSE7831\_UNSTIM\_VS\_INFLUENZA\_STIM\_PDC\_1H\_UP
- 93 GSE24142\_ADULT\_VS\_FETAL\_EARLY\_THYMIC\_PROGENITOR\_DN
- 94 GSE21379\_WT\_VS\_SAP\_KO\_TFH\_CD4\_TCELL\_UP
- 95 REACTOME\_ACTIVATION\_OF\_THE\_MRNA\_UPON\_BINDING\_OF\_THE\_CAP\_BINDING\_COMPLEX
- 96 GSE19888\_ADENOSINE\_A3R\_ACT\_VS\_A3R\_ACT\_WITH\_A3R\_INH\_PRETREATMENT\_IN\_MAST\_CELL\_UP
- 97 GSE14415\_INDUCED\_TREG\_VS\_FAILED\_INDUCED\_TREG\_UP
- 98 GSE37532\_TREG\_VS\_TCONV\_CD4\_TCELL\_FROM\_LN\_UP
- 99 REACTOME\_FORMATION\_OF\_THE\_TERNARY\_COMPLEX\_AND\_SUBSEQUENTLY\_THE\_A35\_COMPLEX
- 100 GSE411\_100MIN\_VS\_400MIN\_IL6\_STIM\_MACROPHAGE\_DN
